# Supplementary material
Source: Research Square preprint supplement (doi:10.21203/rs.3.rs-10015856/v1)

## HLA-A\*01:01

TTDPSFLGRYM

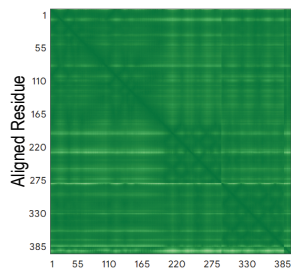

TTDPSFLGRY (Wuhan-1)

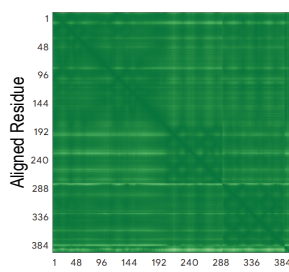

TTDL~~S~~FLGRY (Delta)

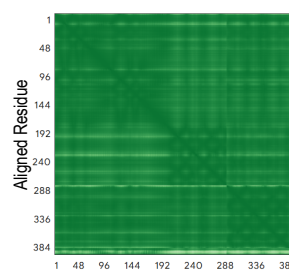

TTD~~S~~SFLGRY (Omicron)

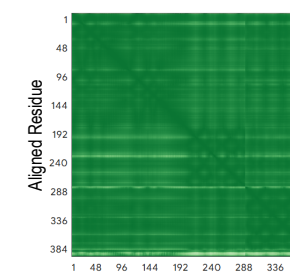

TTDPSFLGR

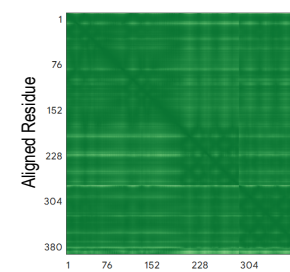

TTDPSFLG

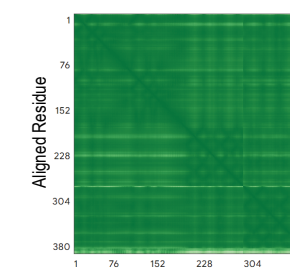

## HLA-A\*02:01

LLLDRLNQL

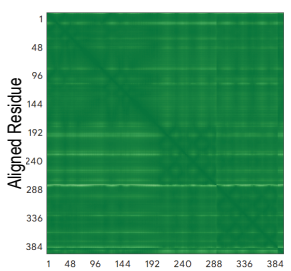

YLFDESGEF

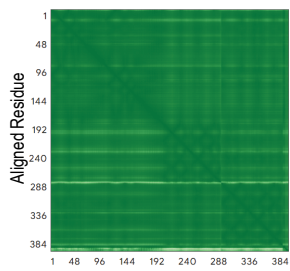

YLFDESGEFKL

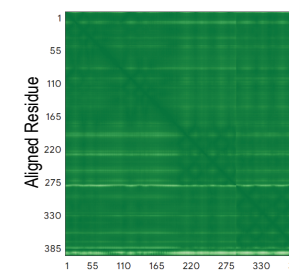

QLMCQPILL

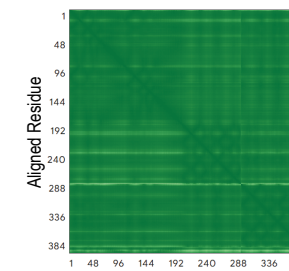

FGDDTVIEV

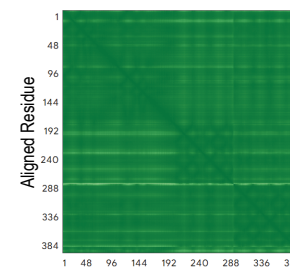

PTDNYITTY

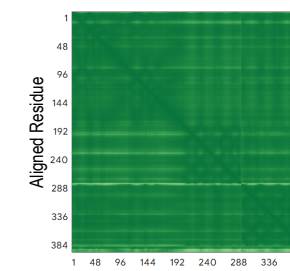

## HLA-A\*03:01

KTFPPTEPK

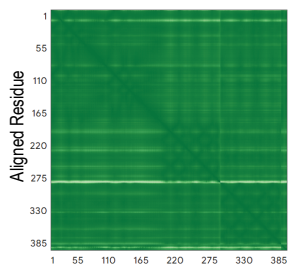

KTFPPTEPKK

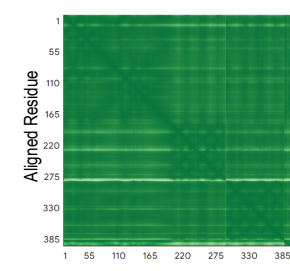

## HLA-A\*11:01

KTIQPRVEK

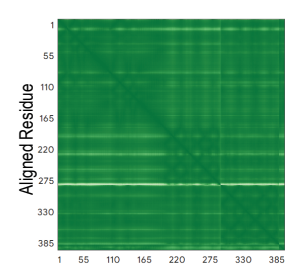

ATSRTL~~S~~YYK

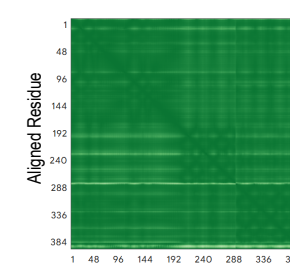

LPKEITVAT

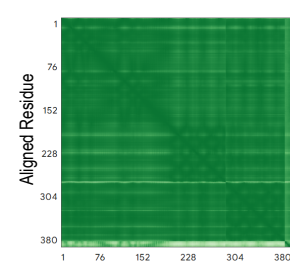

## HLA-B\*44:03

SEVGPEHSL

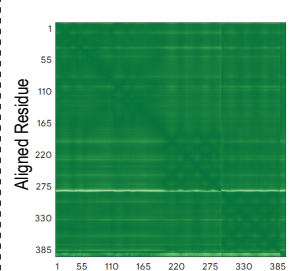

SEVGPEHSLAEY

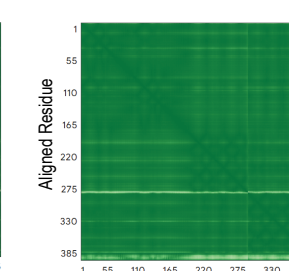

AEAELAKNV

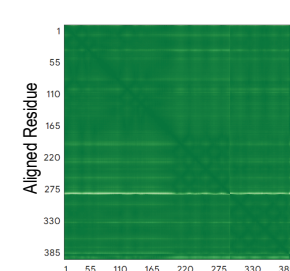

Supplement: Supplementary file 3 [file 21e5cc1bd488d6fadc7ee6da.pdf]
