# Supplementary material
Source: Research Square preprint supplement (doi:10.21203/rs.3.rs-10015856/v1)

**A**  
KTFPPTPEPK - HLA-A\*03:01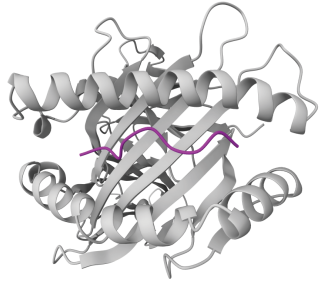

KTFPPTPEPKK - HLA-A\*03:01

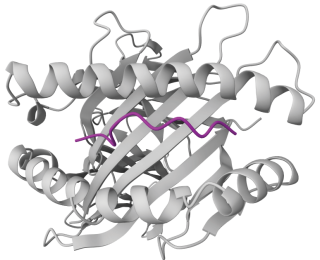

KTIQPRVEK - HLA-A\*03:01

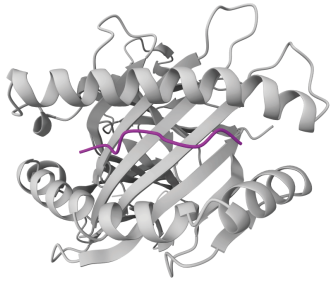

SEVGPEHSL - HLA-B\*44:03

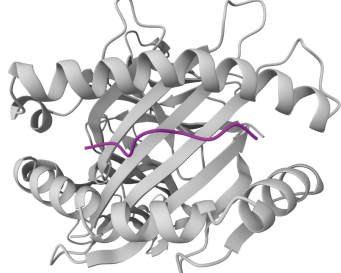

SEVGPEHSLAEY - HLA-B\*44:03

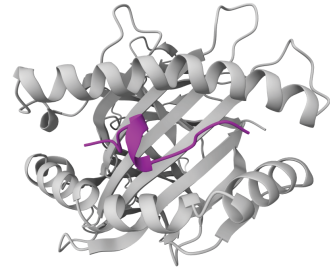

AEELAKNV - HLA-B\*44:03

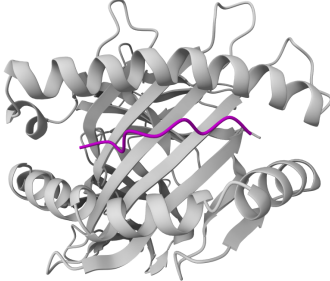**B**  
H<sub>3</sub>N ————— Peptide ————— COO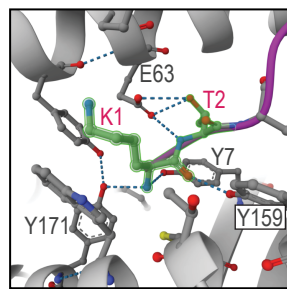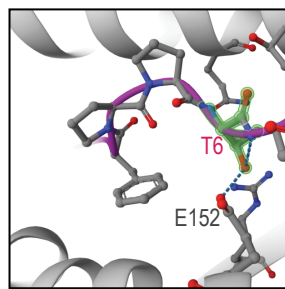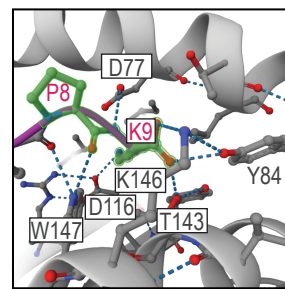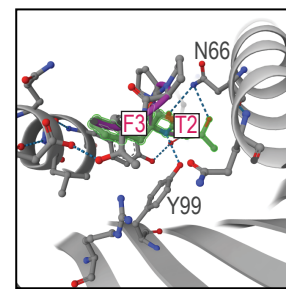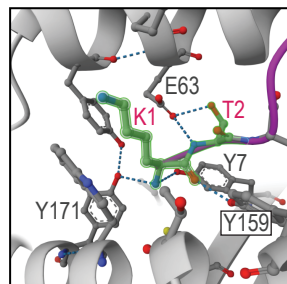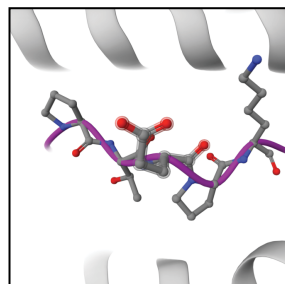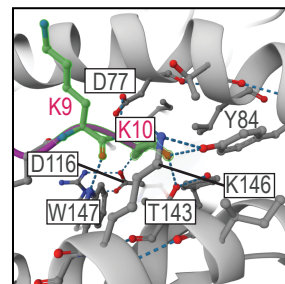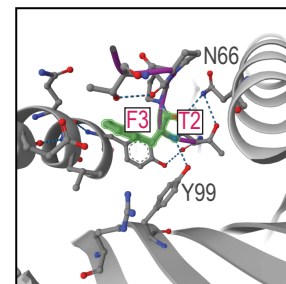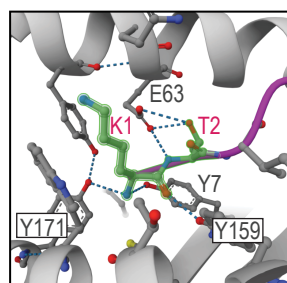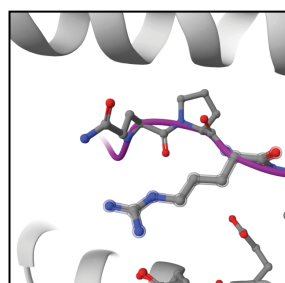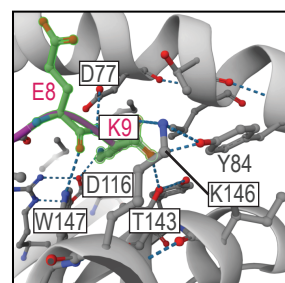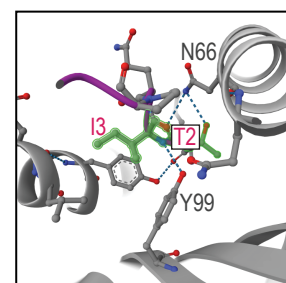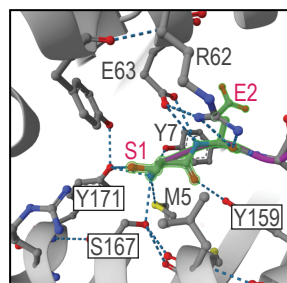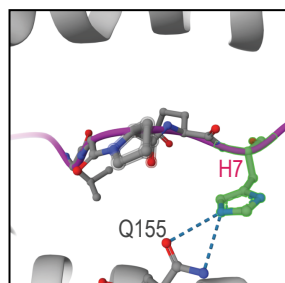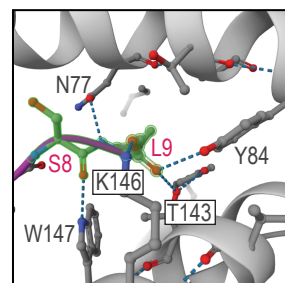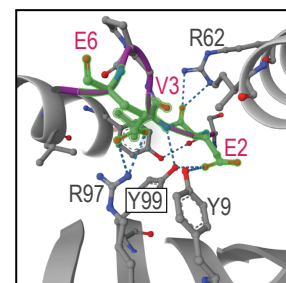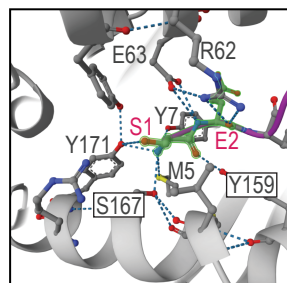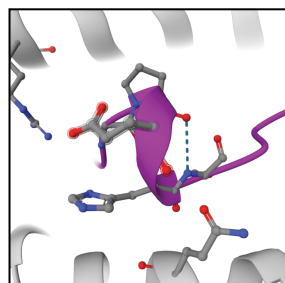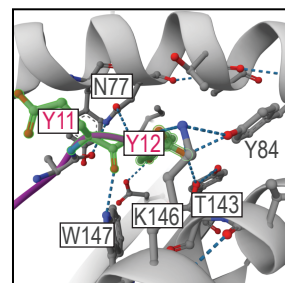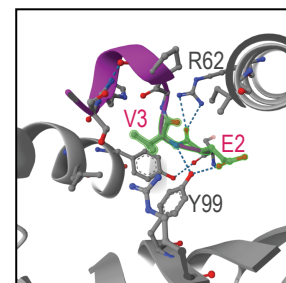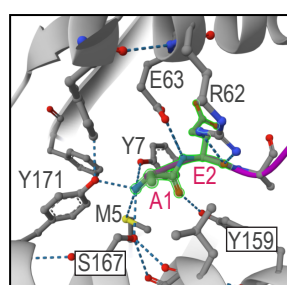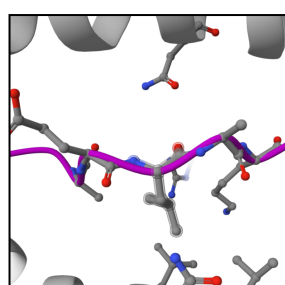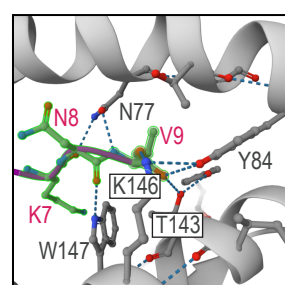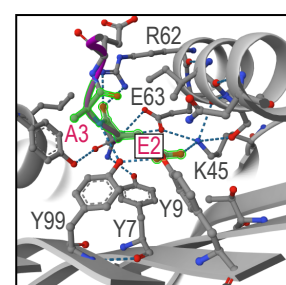**C**

Supplement: Supplementary file 4 [file e7eb691116f49e04fcb22bc0.pdf]
