# Supplementary material
Source: Research Square preprint supplement (doi:10.21203/rs.3.rs-10015856/v1)
Supplement: Supplementary file 1 [file 013fe3e45cf769ea2d2acb4d.docx]

**Table 2.** SARS-CoV-2-derived CD8⁺ T cell peptides selected from the BNT162b4 vaccine.

|  | Peptide sequence | Peptide length | Interacting HLA allele | Source protein in SARS-CoV-2 |
| --- | --- | --- | --- | --- |
|  | TTDPSFLGRYM  TTDPSFLGRY  TTDLSFLGRY  TTDSSFLGRY  TTDSSFLGR  TTDPSFLG  LLLDRLNQL  YLFDESGEF  YLFDESGEFKL  QLMCQPILL  FGDDTVIEV  PTDNYITTY  KTFPPTEPK  KTFPPTEPKK  KTIQPRVEK  ATSRTLSYYK  LPKEITVAT  SEVGPEHSL  SEVGPEHSLAEY  AEAELAKNV | 11  10  10  10  9  8  9  9  11  9  9  9  9  10  9  10  9  9  12  9 | A*01:01  A*01:01  A*01:01  A*01:01  A*01:01  A*01:01  A*02:01  A*02:01  A*02:01  A*02:01  A*02:01  A*02:01  A*03:01  A*03:01  A*11:01  A*11:01  A*11:01  B*44:03  B*44:03  B*44:03 | NSP3  NSP3  NSP3  NSP3  NSP3  NSP3  N  NSP3  NSP3  NSP3  NSP3  NSP3  N  N  NSP2  M  M  NSP2  NSP2  NSP3 |

Included in the mRNA BNT162b4 vaccine (Arieta et al. 2023).

Confirmed with the MHCvalidator approach (Kovalchik et al. 2025).

Mutated in Delta variant.

Mutated in Omicron variant.
