# Supplementary material
Source: Research Square preprint supplement (doi:10.21203/rs.3.rs-10015856/v1)

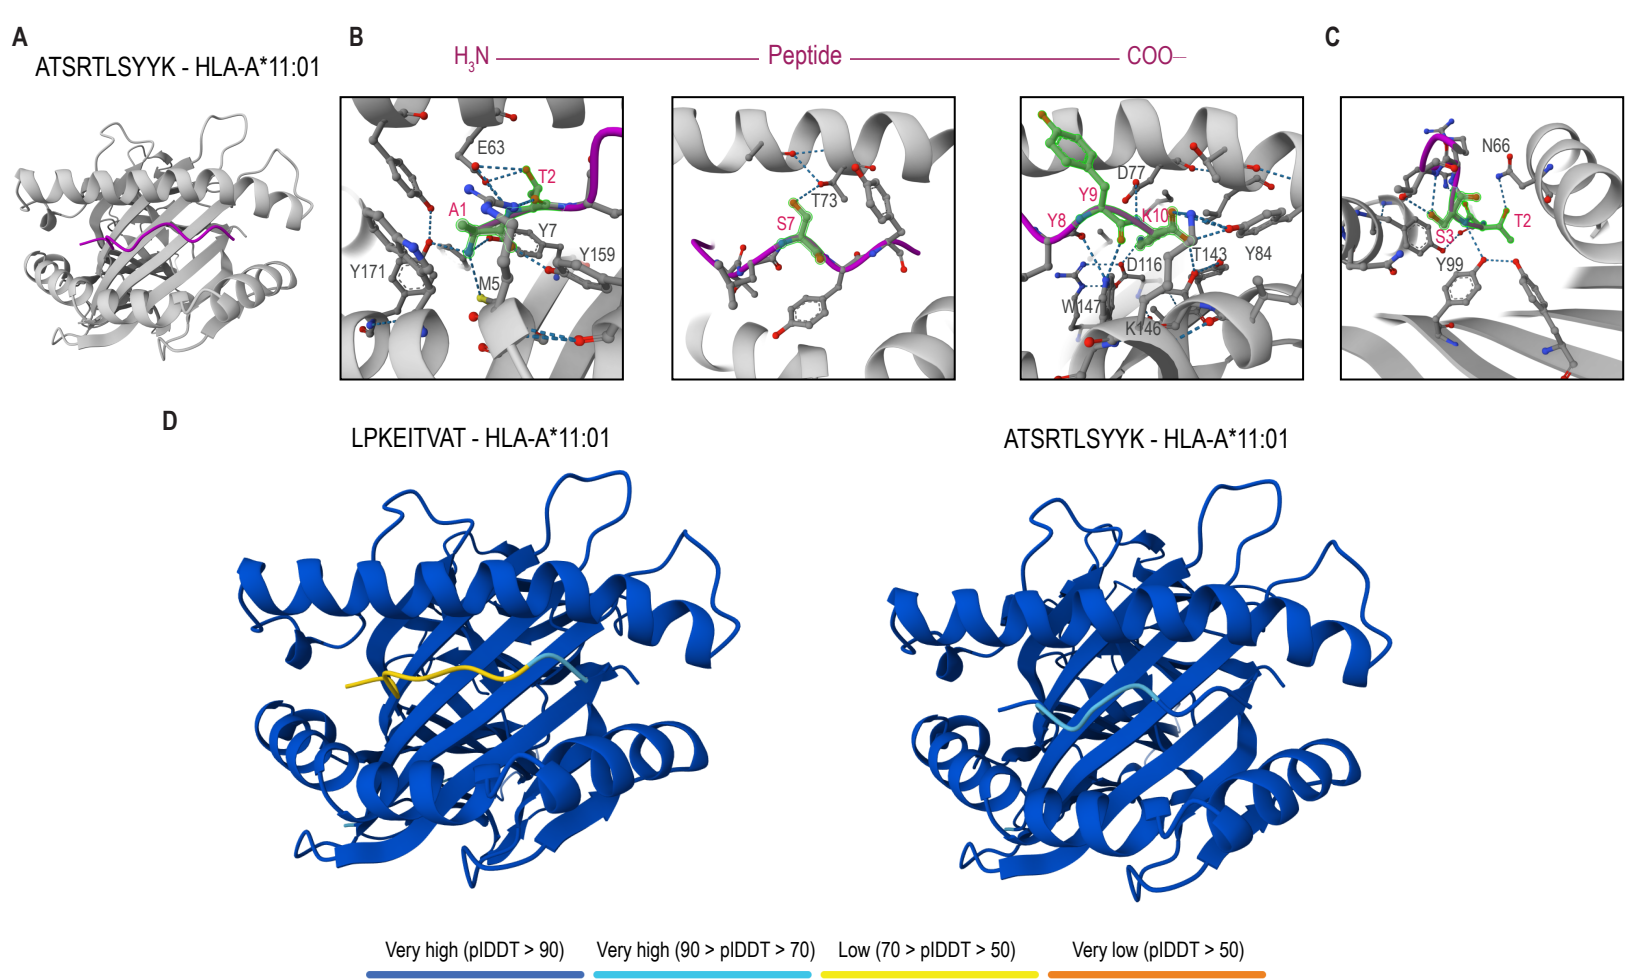

Supplement: Supplementary file 2 [file 07383aa6089b4207c4bfea27.pdf]

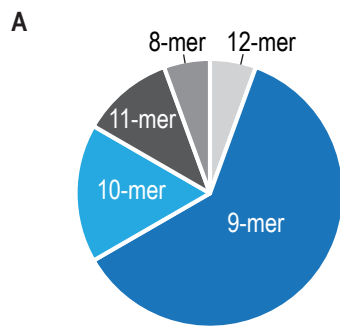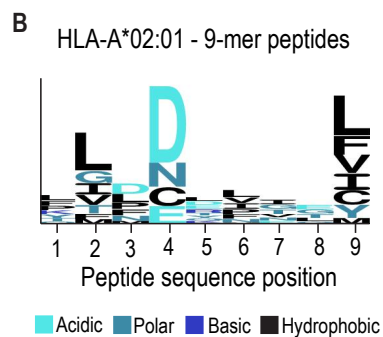

**D**

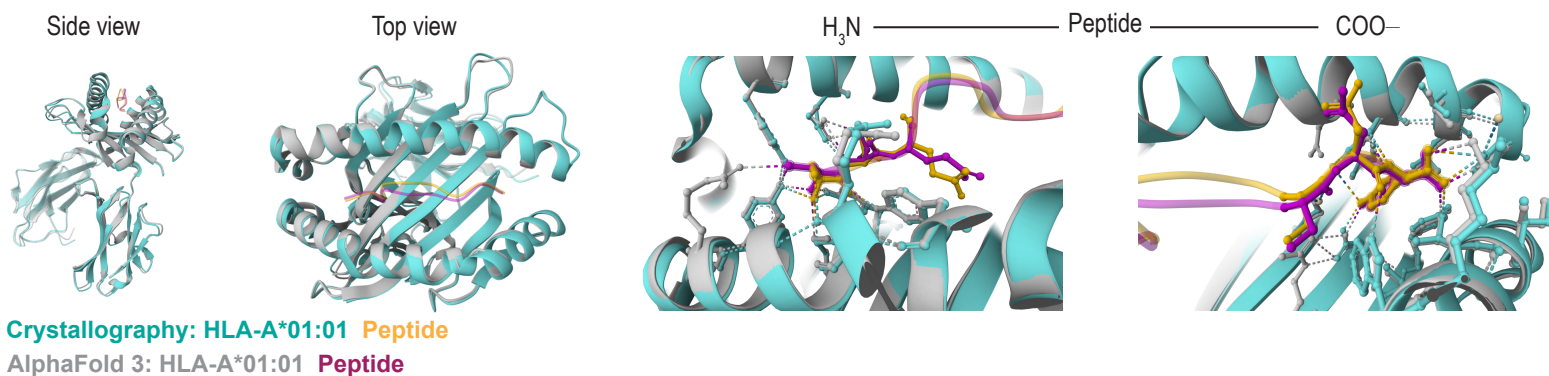

**E**

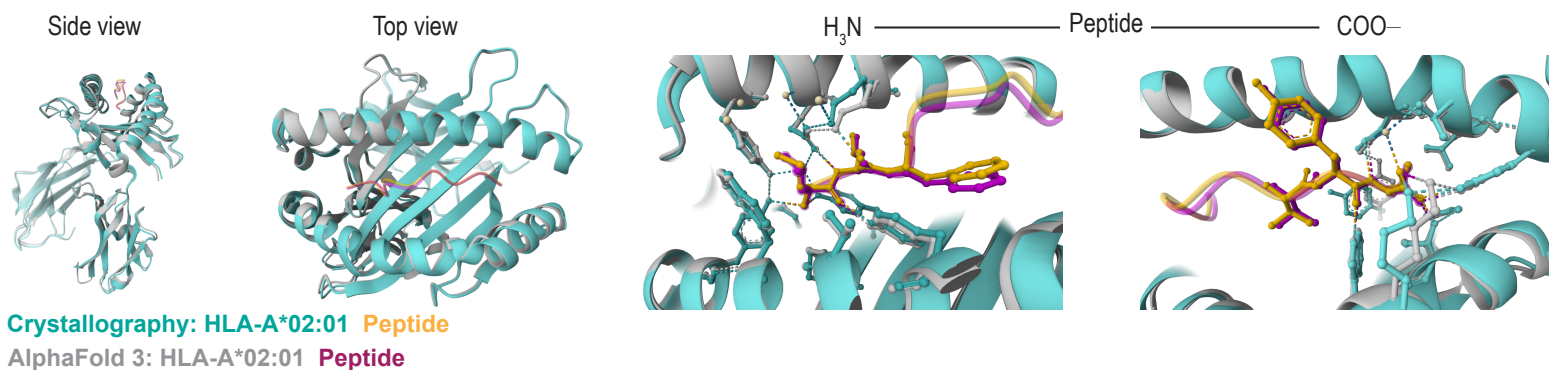

Supplement: Supplementary file 5 [file f97f128f777fdf2933ae3fbd.pdf]
